# Supplementary material
Source: Research Square preprint supplement (doi:10.21203/rs.3.rs-9974115/v1)
Supplement: Supplementary file 1 [file e59e791308b2de0e089b0183.docx]

| Annex I | | | | |
| --- | --- | --- | --- | --- |
| **Domain** | **Variable** | **Description** | **Measurement / Instrument** | **Type in Model** |
| Demographic/Biological | Age | Participant age | Age in completed years, standardized (z–score) | Exogenous |
| Demographic/Biological | Gender | Gender of participant | Self-reported | Exogenous |
| Socioeconomic | Education | Educational attainment | Years of schooling completed (standardized z-score) | Exogenous |
| Socioeconomic | Residence | Place of residence | Rural Vs Urban | Exogenous |
| Socioeconomic | Ethnicity | Reported ethnic group | 3 Categories (BhraminChhetri/Janajati/Marginalized) | Exogenous |
| Socioeconomic | Marital Status | Married/cohabiting status | Self-reported marital status | Exogenous |
| Behavioral | Tobacco Use | Current tobacco use | Self‑reported use of smoked or smokeless tobacco | Mediator |
| Behavioral | Alcohol Use | Current alcohol consumption | Self‑reported alcohol use | Mediator |
| Behavioral | High Salt Use | High dietary salt intake behavior | Composite behavioral questionnaire | Mediator |
| Psychosocial | Stress Score | Perceived psychological stress | Summed scale score from stress assessment items | Mediator |
| Anthropometric | Obesity Categories | Obesity status | 3 Categories (Normal/overweight/obese) | Intermediate Mediator |
| Clinical Outcome | hypertension | Blood pressure status | 0 vs 1 | Outcome |
